# Supplementary material for: Global Transcriptome Characterization and Assembly of the Thermophilic Ascomycete Chaetomium thermophilum
Source: MDPI journal article supplement (doi:10.3390/genes12101549), 2021-09-29
Supplement: s1 [file s1]

Table- 1A: RNA-seq data alignment results for reads of different samples.

| Sample name | Input read | overall alignment rate |
|-------------|------------|------------------------|
| G1          | 69350606   | 95.94%                 |
| G2          | 73230226   | 95.87%                 |
| G3          | 59976502   | 95.83%                 |

Table- 1B: Different classes of assembled transcripts

| Class code | Description                                                                          | Total annotation |
|------------|--------------------------------------------------------------------------------------|------------------|
| =          | Complete match of intron chain                                                       | 3078             |
| c          | Contained in reference (and intron isoform compatible)                               | 323              |
| k          | containment of reference (reverse containment)                                       | 0                |
| j          | At least one splice junction match                                                   | 4234             |
| e          | At Single exon, overlapping intron a possibly pre-mRNA fragment (un spliced intron)  | 420              |
| o          | Other same strand overlap with reference exons                                       | 1896             |
| s          | Intron match on the opposite strand (likely a mapping error)                         | 158              |
| x          | Exonic overlap on the opposite strand (like , 'o' or 'e' but on the opposite strand) | 1754             |
| i          | fully contained in a reference intron                                                | 28               |
| y          | Contains a reference within is intron(s)                                             | 5                |
| p          | Possible polymerase run-on (no actual overlap)                                       | 706              |
| r          | repeat (at least 50% bases soft masked)                                              | 0                |
| u          | none of the above (unknown, intergenic)                                              | 2744             |
