# Supplementary figures and images for: Global Transcriptome Characterization and Assembly of the Thermophilic Ascomycete Chaetomium thermophilum
Source: MDPI journal article supplement (doi:10.3390/genes12101549), 2021-09-29

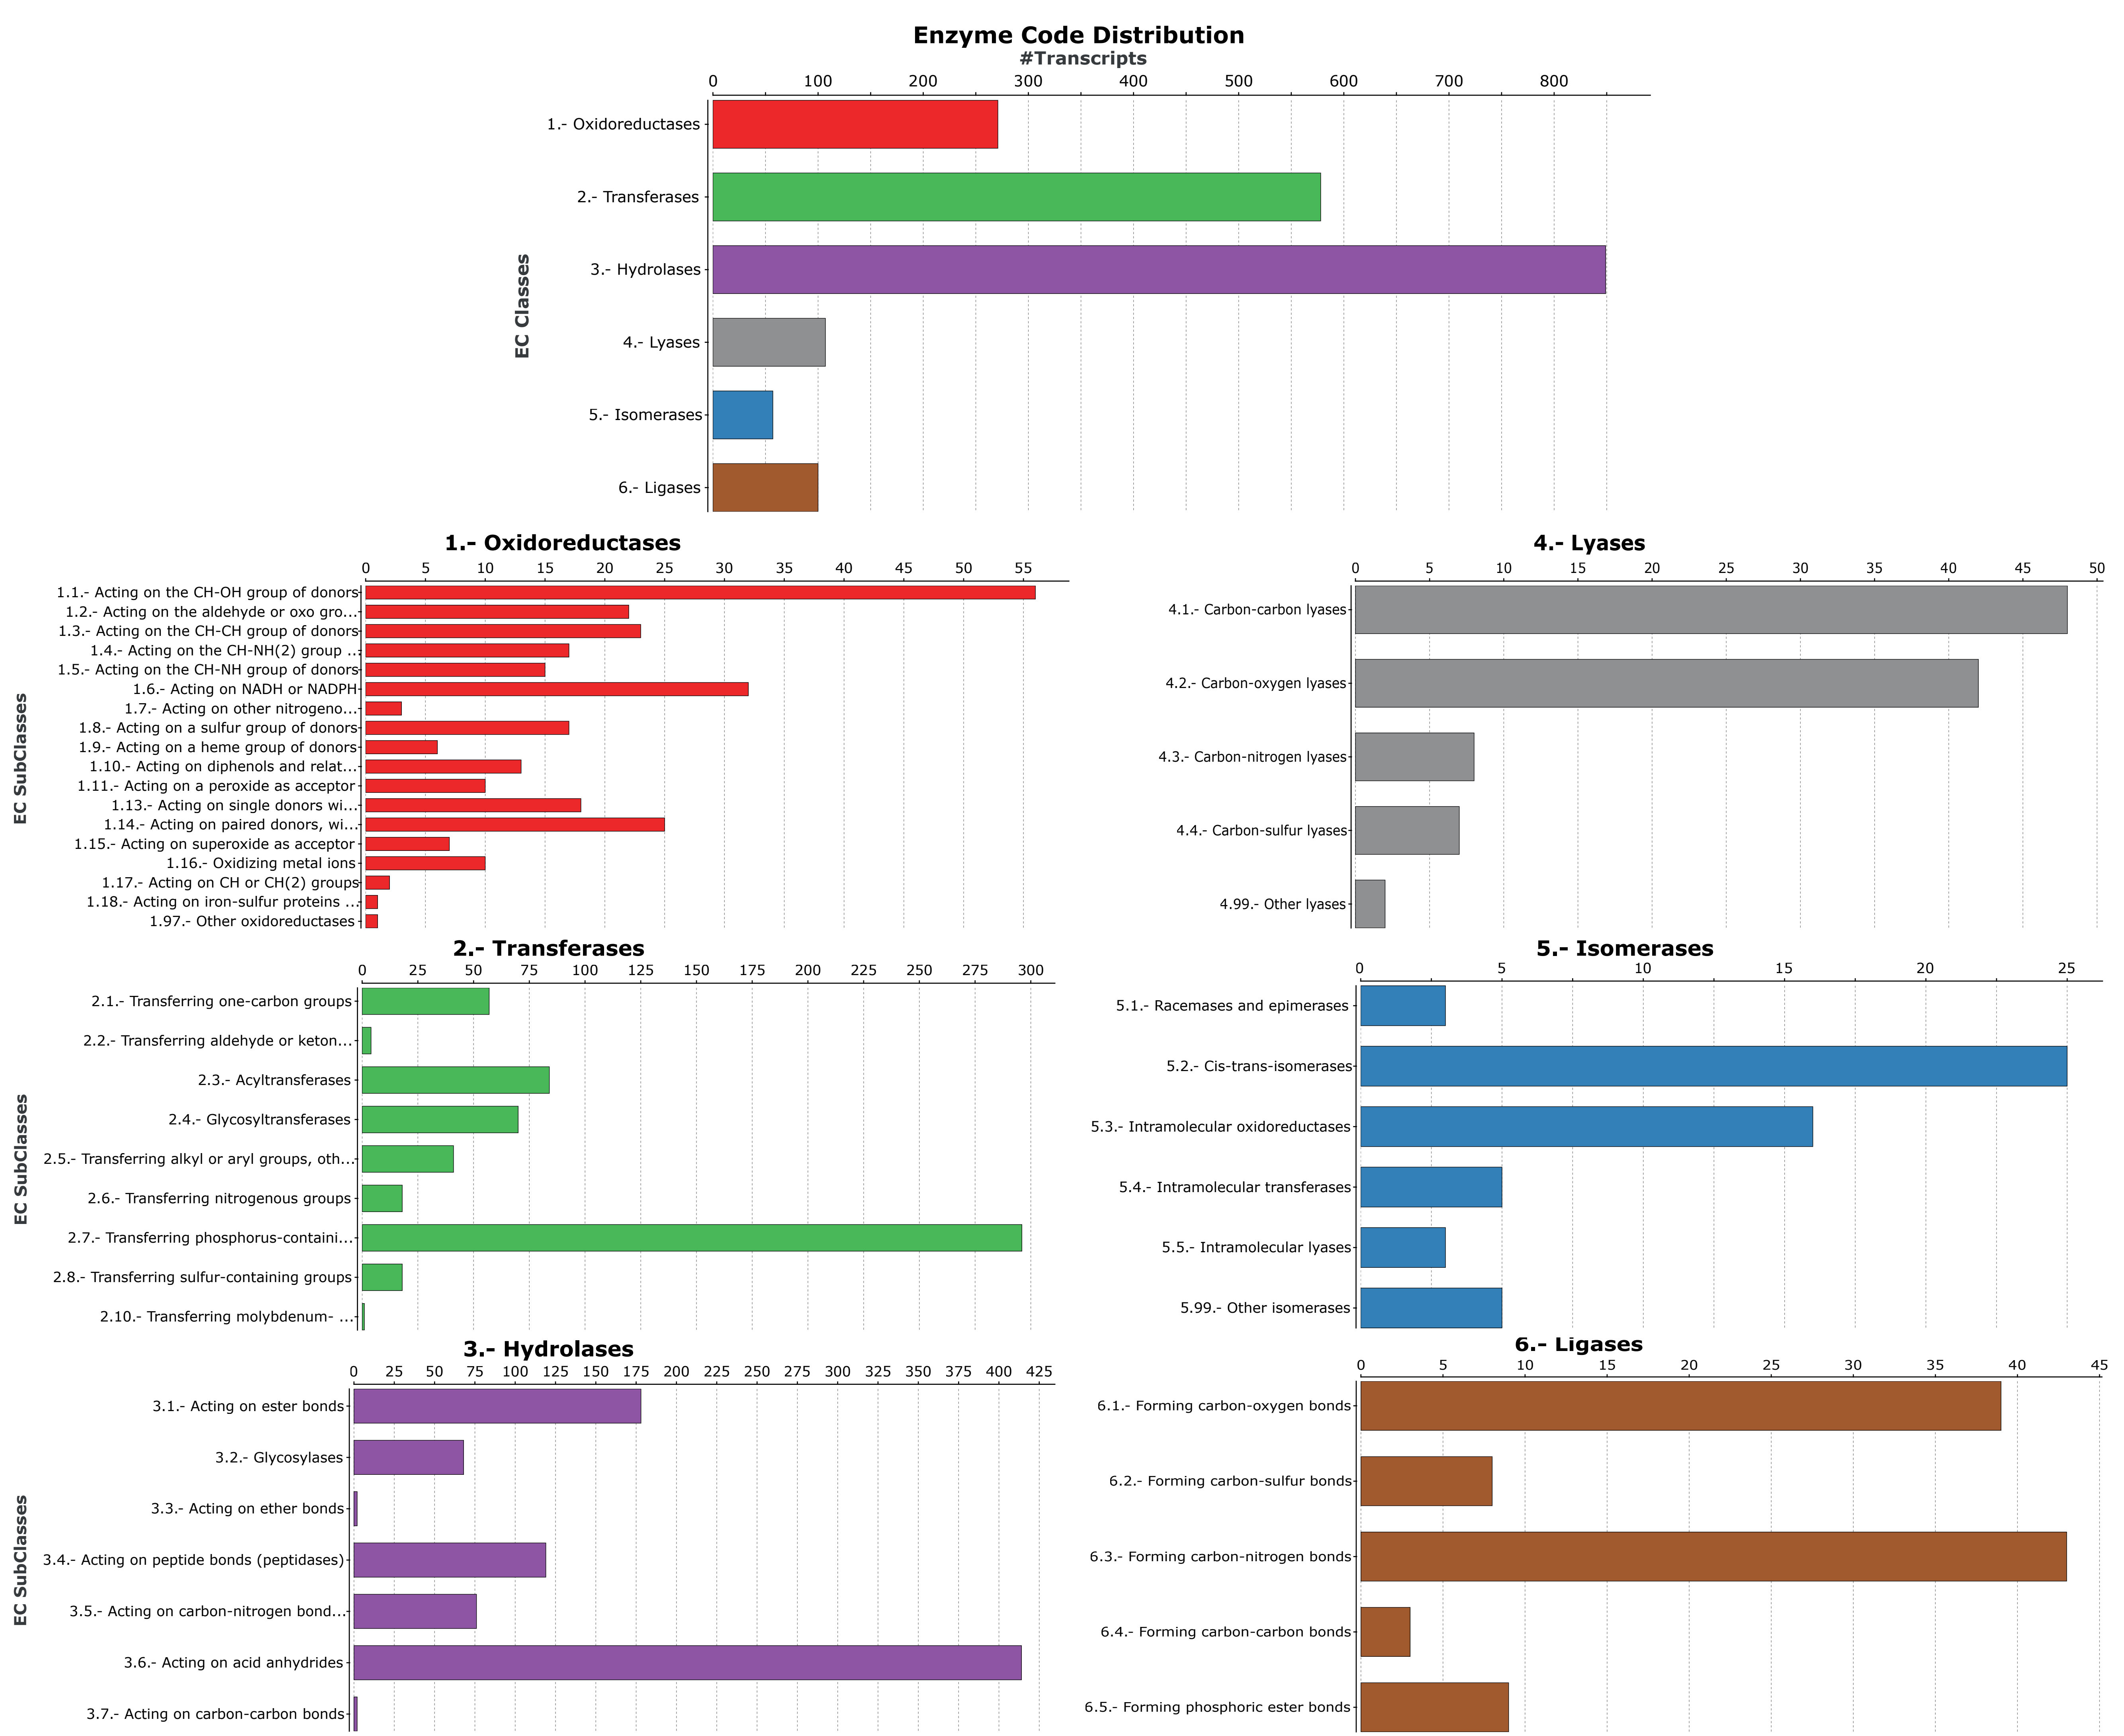

Supplement: s1 [file s1]

# Most abundant Go-slim terms

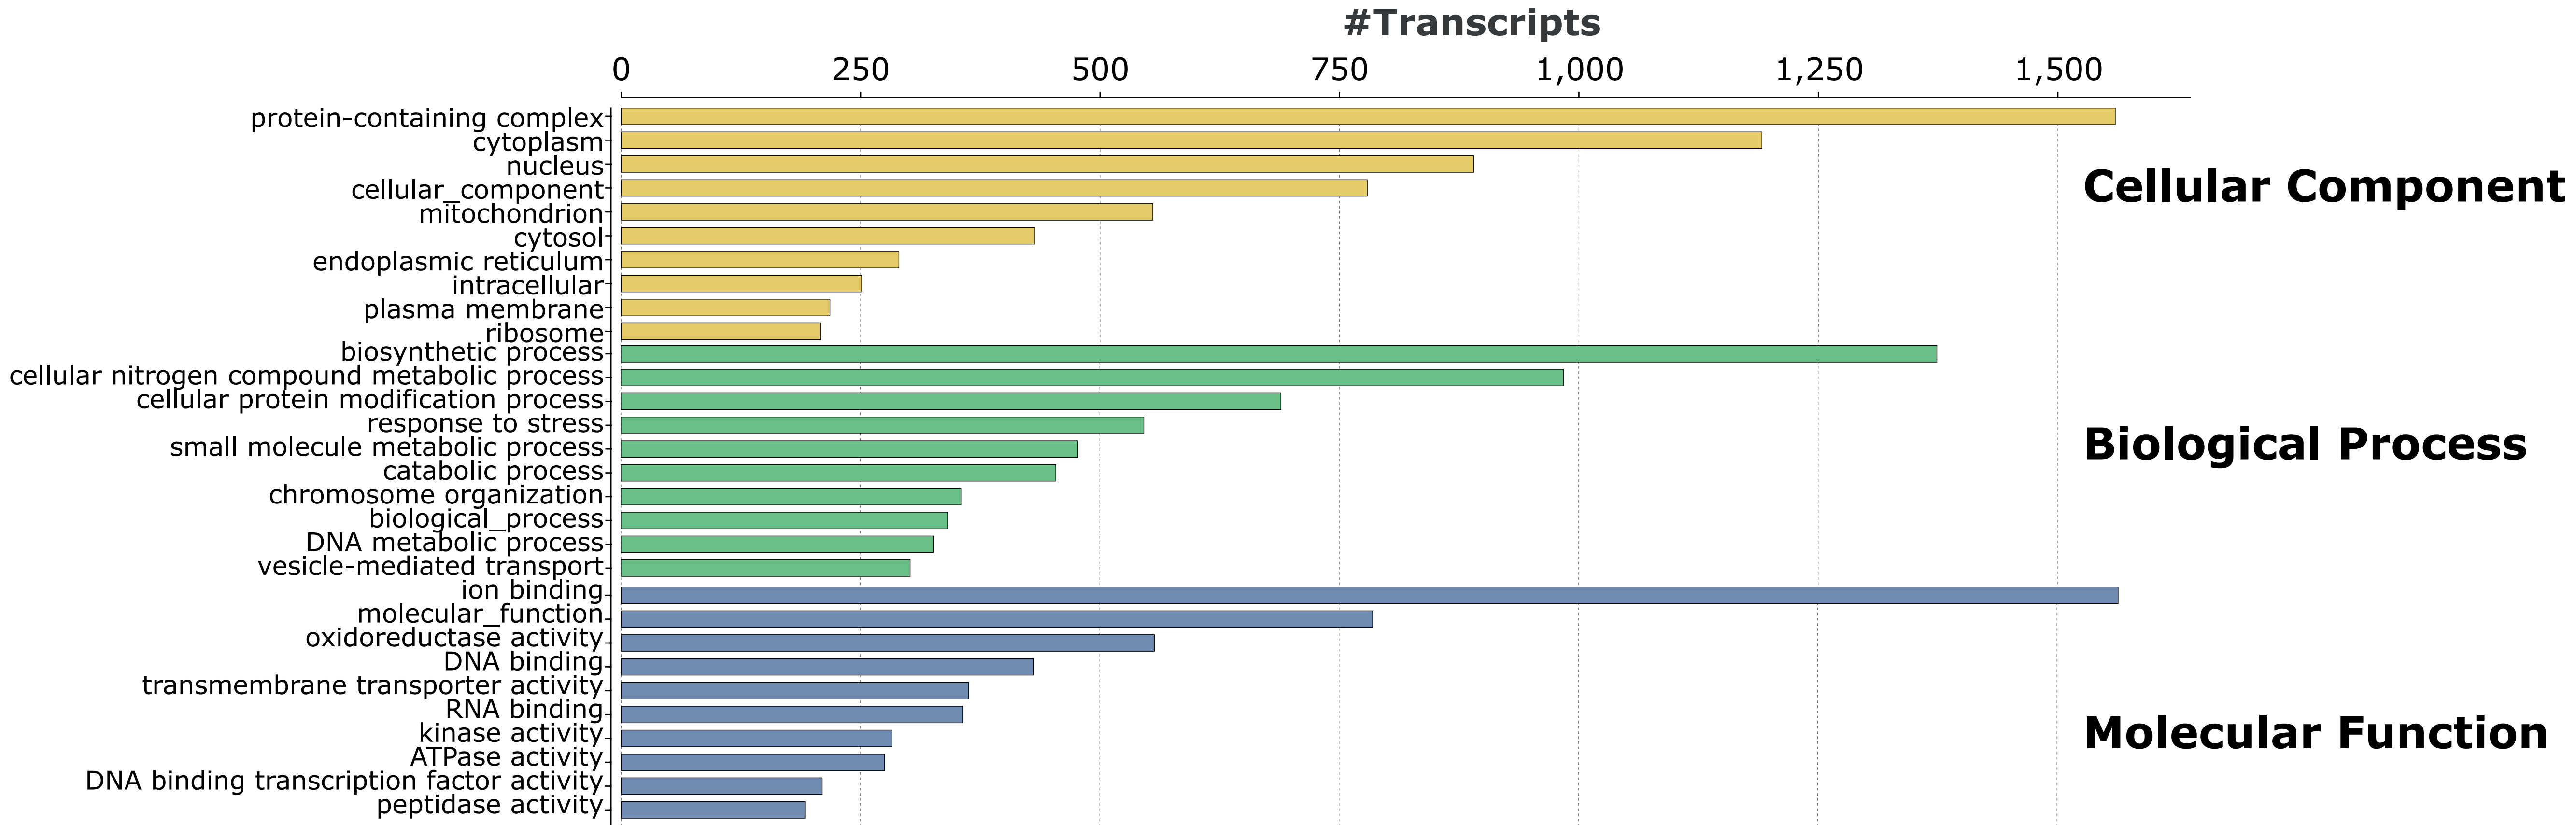

Supplement: s1 [file s1]
